# Supplementary material for: High dispersal capacity of Culicoides obsoletus (Diptera: Ceratopogonidae), vector of bluetongue and Schmallenberg viruses, revealed by landscape genetic analyses
Source: Parasit Vectors. 2021 Feb 3;14:93. doi: 10.1186/s13071-020-04522-3 (PMC7860033; doi:10.1186/s13071-020-04522-3)
Supplement: Supplementary file 12 — Additional file 12: Table S6. Results of univariate analyses: determination coefficients (R2) estimated from univariate regressions between genetic and environmental distances. [C] indicates that the considered environmental raster was treated as a conductance factor for the computation of environmental distances with circuit theory. [R] indicates that the considered environmental raster was treated as a resistance factor for the computation of environmental distances with circuit theory. Q Difference between environmental multiple regression on distance matrices (MRDM) R2 and null raster MRDM R2. The results for K = 10 are not shown as they were non-significant. [file 13071_2020_4522_MOESM12_ESM.xlsx]

## Sheet: Feuil1
	k	β	Q	r	p-value
FCA
Cattle distribution [C]	100	0.0991	0.0092	0.0098	0.0010
Cattle distribution [C]	1000	0.1733	0.0294	0.0300	0.0010
Elevation [R]	100	0.0418	0.0011	0.0018	0.0050
Elevation [R]	1000	0.0434	0.0013	0.0019	0.0040
Land cover grassland [R]	100	0.1007	0.0095	0.0102	0.0020
Land cover grassland [R]	1000	0.1080	0.0110	0.0117	0.0010
Sheep distribution [C]	100	0.0585	0.0028	0.0034	0.0040
Sheep distribution [C]	1000	0.0834	0.0063	0.0070	0.0020
Null raster [R]		-0.0250	0.0000	0.0006	0.0050
aR
Elevation [R]	100	0.0254	0.0002	0.0006	0.0080
Elevation [R]	1000	0.0291	0.0004	0.0009	0.0030
Land cover grassland [R]	100	0.0448	0.0015	0.0020	0.0010
Land cover grassland [R]	1000	0.0539	0.0024	0.0029	0.0010
Land cover urban areas [R]	100	0.0725	0.0048	0.0053	0.0010
Land cover urban areas [R]	1000	0.0879	0.0073	0.0077	0.0010
Null raster [R]		-0.0216	0.0000	0.0005	0.0010
